# Supplementary material
Source: MDPI journal article supplement (https://www.mdpi.com/2311-7524/9/10/1159)
Supplement: s1 [file s1]

## Supplementary Materials

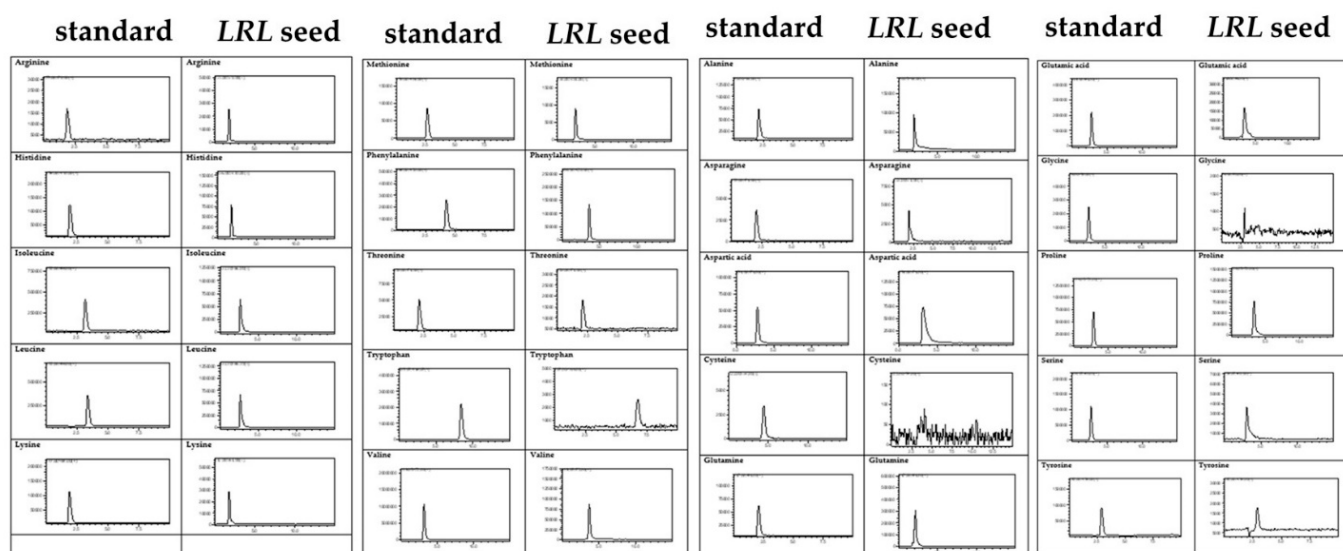

Figure S1. The chromatogram of amino acids in both standard and LRL seed samples from LC/MS/MS

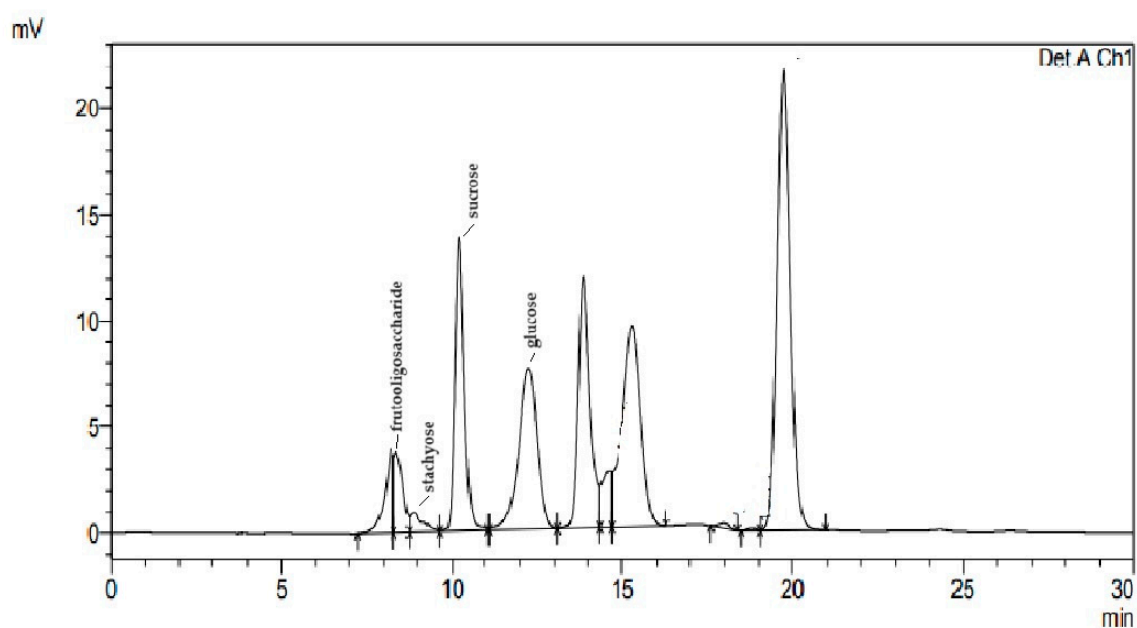

Figure S2. The HPLC chromatogram of sugars and oligosaccharides including stachyose, fructooligosaccharide, sucrose, and glucose in LRL seed.
